# Supplementary material for: Applying low levels of strain to model nascent phenomenon of retinal pathologies
Source: Royal Society of Chemistry journal article supplement (doi:10.1039/d4lc00205a), 2024-01-01
Supplement: d4lc00205a1.pdf [file d4lc00205a1.pdf]

## SUPPLEMENTAL FIGURES

Table S1: Fold change of proteins 24 hours after strain. N = 5.

| <b>Protein</b> | <b>Average <math>\Delta\Delta</math> Ct</b> | <b>Average Fold Change</b> |
|----------------|---------------------------------------------|----------------------------|
| APP            | 1.25                                        | 0.62                       |
| ApoE           | 0.02                                        | 0.96                       |
| TIMP-3         | 0.09                                        | 1.07                       |
| Vitronectin    | -0.18                                       | 1.16                       |
